# Supplementary material for: Phenotypic Diversity of Almond-Leaved Pear (Pyrus spinosa Forssk.) along Eastern Adriatic Coast
Source: MDPI journal article supplement (doi:10.3390/f12121630), 2021-11-25
Supplement: s1 [file s1]

**Table S1.** Sample size ( $n$ ), geographic coordinates, altitudes and environmental variables for 17 *Pyrus spinosa* populations ( $n = 170$ ). Environmental variables: BIO1 (Annual Mean Temperature); BIO3 (Isothermality (BIO2/BIO7)  $\times 100$ ); BIO4 (Temperature Seasonality (standard deviation  $\times 100$ )); BIO5 (Max Temperature of Warmest Month); BIO8 (Mean Temperature of Wettest Quarter); BIO9 (Mean Temperature of Driest Quarter); BIO12 (Annual Precipitation); BIO15 (Precipitation Seasonality (Coefficient of Variation)); BIO17 (Precipitation of Driest Quarter); BIO19 (Precipitation of Coldest Quarter); SOLAR 6 (Insolation in June).

| Pop. ID | Population      | $n$ | Longitude | Latitude | Altitude | BIO1 | BIO3 | BIO4  | BIO5 | BIO8 | BIO9 | BIO12 | BIO15 | BIO17 | BIO19 | SOLAR6 |
|---------|-----------------|-----|-----------|----------|----------|------|------|-------|------|------|------|-------|-------|-------|-------|--------|
| P01     | Škropeti        | 10  | 13.8272   | 45.2732  | 330      | 12.2 | 34.1 | 697.4 | 26.1 | 8.2  | 4.8  | 1060  | 19.7  | 215   | 234   | 20709  |
| P02     | Žminj           | 10  | 13.9067   | 45.1837  | 382      | 11.9 | 34.5 | 705   | 26.2 | 7.8  | 4.5  | 1039  | 20.2  | 215   | 234   | 20970  |
| P03     | Pula            | 10  | 13.9005   | 44.8756  | 67       | 13.9 | 32.3 | 671.4 | 27.1 | 14.6 | 20.3 | 790   | 25.4  | 153   | 192   | 21741  |
| P04     | Vir             | 10  | 15.0364   | 44.323   | 11       | 15.1 | 28.2 | 621.2 | 26.8 | 16   | 23.1 | 909   | 33    | 144   | 236   | 22578  |
| P05     | Obrovac         | 10  | 15.6628   | 44.2143  | 117      | 13.9 | 30.5 | 692.9 | 28   | 14.6 | 22.7 | 940   | 25.5  | 162   | 237   | 22425  |
| P06     | Nin             | 10  | 15.3341   | 44.212   | 95       | 14   | 33.9 | 669   | 27.9 | 14.6 | 22.4 | 926   | 30    | 148   | 239   | 22320  |
| P07     | Krka            | 10  | 16.0479   | 44.0304  | 269      | 13.4 | 35.3 | 705.7 | 28.4 | 9.6  | 22.5 | 904   | 23.6  | 164   | 232   | 22630  |
| P08     | Drniš           | 10  | 16.3273   | 43.7767  | 355      | 13.1 | 33.4 | 723.4 | 28   | 9    | 22.3 | 876   | 24.9  | 157   | 228   | 22437  |
| P09     | Sinj            | 10  | 16.6208   | 43.611   | 347      | 13.4 | 34.2 | 733.2 | 28.8 | 9.1  | 22.8 | 878   | 26.8  | 152   | 235   | 22801  |
| P10     | Muč             | 10  | 16.6255   | 43.606   | 346      | 13.4 | 34   | 736.5 | 28.9 | 9.1  | 22.9 | 876   | 27.3  | 151   | 235   | 22750  |
| P11     | Blato na Cetini | 10  | 16.837    | 43.4805  | 226      | 13.9 | 31.1 | 700.2 | 27.8 | 10   | 22.8 | 870   | 27.9  | 146   | 239   | 22747  |
| P12     | Biokovo         | 10  | 17.022    | 43.3208  | 331      | 12.2 | 36.8 | 634.3 | 24.9 | 9.4  | 20.1 | 904   | 29.5  | 142   | 252   | 22644  |
| P13     | Brač            | 10  | 16.7999   | 43.3017  | 330      | 14.7 | 26.1 | 681.7 | 27.3 | 11.3 | 23.6 | 813   | 31.5  | 127   | 233   | 23111  |
| P14     | Hvar            | 10  | 16.5975   | 43.1447  | 623      | 14.2 | 26.8 | 624.3 | 25.9 | 11.5 | 22.4 | 727   | 32.8  | 108   | 191   | 23257  |
| P15     | Pelješac        | 10  | 17.086    | 42.9954  | 280      | 15.2 | 29.2 | 594.4 | 26.9 | 12.9 | 23   | 801   | 34    | 111   | 229   | 23230  |
| P16     | Slano           | 10  | 17.8484   | 42.8286  | 326      | 15.2 | 27.3 | 663.5 | 27.6 | 12.1 | 23.9 | 1067  | 36.9  | 140   | 333   | 23070  |
| P17     | Konavle         | 10  | 18.3581   | 42.5011  | 340      | 15.4 | 29.9 | 615.7 | 27.5 | 12.7 | 23.4 | 1247  | 45.2  | 130   | 418   | 23395  |

**Table S2.** Descriptive statistics of the measured phenotypic traits at the population level. Descriptive statistical parameters: M (Average Value); CV (Coefficient of Variation (%)). Leaf measured traits: LA (Leaf Area), P (Perimeter), FC (Form Coefficient), LL (Leaf Length), MLW (Maximal Leaf Width), PMLW (Position of Maximal Leaf Width), LWT (Leaf Blade Width at 90% of Leaf Blade Length), LA1 (Leaf Angle 1), LA2 (Leaf Angle 2), PL (Petiole Length). Acronyms of populations: P01 – Škropeti; P02 – Žminj; P03 – Pula; P04 – Vir; P05 – Obrovac; P06 – Nin; P07 – Krka; P08 – Drniš; P09 – Sinj; P10 – Muć; P11 – Blato na Cetini; P12 – Biokovo; P13 – Brač; P14 – Hvar; P15 – Pelješac; P16 – Slano; P17 – Konavle.

| Population | LA   |       | P    |       | FC   |       | LL   |       | MLW  |       | PMLW |       | LWT  |       | LA1   |       | LA2   |       | PL   |       |
|------------|------|-------|------|-------|------|-------|------|-------|------|-------|------|-------|------|-------|-------|-------|-------|-------|------|-------|
|            | M    | CV    | M     | CV    | M     | CV    | M    | CV    |
| P01        | 4.58 | 41.18 | 9.15 | 23.06 | 0.68 | 14.55 | 3.77 | 25.20 | 1.66 | 21.23 | 1.93 | 28.09 | 0.86 | 23.75 | 39.79 | 21.48 | 33.02 | 20.45 | 1.35 | 33.64 |
| P02        | 4.72 | 42.43 | 9.11 | 21.54 | 0.69 | 13.53 | 3.73 | 22.42 | 1.73 | 26.71 | 1.93 | 23.45 | 0.89 | 29.51 | 39.49 | 19.03 | 33.34 | 16.84 | 1.34 | 42.10 |
| P03        | 3.57 | 31.11 | 8.72 | 17.79 | 0.59 | 14.78 | 3.62 | 19.07 | 1.37 | 18.47 | 1.90 | 19.41 | 0.72 | 27.37 | 35.09 | 16.44 | 28.03 | 15.98 | 1.18 | 42.67 |
| P04        | 3.79 | 28.76 | 9.34 | 20.49 | 0.56 | 20.88 | 3.95 | 22.21 | 1.35 | 16.09 | 2.00 | 24.92 | 0.70 | 21.14 | 32.81 | 23.64 | 26.77 | 22.34 | 1.26 | 39.39 |
| P05        | 3.27 | 43.77 | 7.81 | 23.93 | 0.65 | 13.88 | 3.21 | 24.81 | 1.36 | 25.20 | 1.58 | 28.14 | 0.72 | 26.93 | 40.96 | 17.19 | 32.63 | 16.45 | 1.04 | 41.39 |
| P06        | 3.08 | 43.93 | 8.10 | 25.74 | 0.58 | 16.24 | 3.41 | 26.89 | 1.24 | 21.94 | 1.75 | 29.37 | 0.62 | 20.75 | 33.80 | 24.92 | 27.47 | 21.14 | 1.13 | 36.80 |
| P07        | 3.06 | 31.75 | 7.90 | 19.95 | 0.63 | 15.32 | 3.09 | 20.24 | 1.36 | 16.00 | 1.51 | 24.35 | 0.67 | 24.94 | 42.90 | 15.84 | 33.72 | 14.30 | 1.10 | 40.53 |
| P08        | 3.27 | 41.03 | 7.96 | 21.78 | 0.64 | 17.33 | 3.29 | 23.16 | 1.38 | 25.43 | 1.61 | 27.52 | 0.67 | 35.21 | 37.65 | 23.60 | 31.67 | 23.18 | 1.20 | 47.22 |
| P09        | 3.34 | 34.07 | 8.61 | 19.65 | 0.57 | 17.89 | 3.59 | 21.01 | 1.32 | 20.58 | 1.88 | 24.43 | 0.69 | 24.24 | 30.50 | 22.10 | 26.42 | 21.55 | 1.37 | 36.71 |
| P10        | 2.73 | 36.88 | 8.02 | 19.85 | 0.52 | 16.47 | 3.42 | 20.30 | 1.12 | 22.13 | 1.76 | 19.78 | 0.54 | 20.15 | 29.91 | 19.16 | 24.01 | 18.61 | 1.00 | 36.07 |
| P11        | 3.22 | 33.13 | 8.19 | 17.95 | 0.60 | 16.53 | 3.44 | 18.79 | 1.30 | 21.62 | 1.80 | 22.31 | 0.68 | 22.98 | 35.20 | 20.75 | 28.11 | 20.01 | 1.28 | 40.50 |
| P12        | 2.64 | 45.63 | 7.45 | 25.72 | 0.59 | 18.32 | 3.15 | 26.49 | 1.13 | 24.68 | 1.57 | 29.11 | 0.58 | 26.55 | 35.46 | 21.92 | 27.94 | 20.90 | 0.94 | 40.25 |
| P13        | 2.74 | 41.38 | 7.60 | 24.58 | 0.59 | 16.50 | 3.19 | 25.74 | 1.18 | 23.35 | 1.60 | 29.29 | 0.57 | 23.54 | 35.76 | 23.51 | 28.75 | 21.26 | 0.91 | 47.33 |
| P14        | 1.94 | 46.70 | 6.24 | 25.52 | 0.60 | 16.17 | 2.62 | 26.58 | 0.98 | 27.80 | 1.34 | 27.41 | 0.51 | 26.21 | 35.99 | 16.69 | 28.85 | 17.59 | 0.90 | 40.94 |
| P15        | 2.55 | 37.49 | 7.46 | 21.87 | 0.57 | 14.22 | 3.05 | 23.46 | 1.12 | 18.40 | 1.56 | 26.93 | 0.60 | 17.72 | 37.82 | 17.11 | 28.73 | 16.85 | 0.95 | 42.67 |
| P16        | 3.98 | 38.99 | 9.02 | 19.33 | 0.60 | 16.53 | 3.73 | 19.86 | 1.48 | 26.07 | 1.84 | 23.53 | 0.73 | 27.97 | 37.01 | 21.84 | 29.94 | 21.07 | 1.11 | 40.20 |
| P17        | 3.85 | 50.08 | 9.10 | 27.18 | 0.57 | 23.32 | 3.78 | 27.97 | 1.41 | 32.08 | 1.89 | 27.72 | 0.69 | 29.88 | 34.46 | 24.98 | 28.33 | 27.09 | 1.22 | 46.29 |

**Table S3.** Pearson correlation coefficients between 12 environmental variables and scores of the first four principal components.

| Environmental variables                                      | PC—Principal Component |           |           |           |
|--------------------------------------------------------------|------------------------|-----------|-----------|-----------|
|                                                              | PC1                    | PC2       | PC3       | PC4       |
| BIO1 (Annual Mean Temperature)                               | -0.941038              | -0.038166 | -0.114275 | -0.138687 |
| BIO3 (Isothermality (BIO2/BIO7) ×100))                       | 0.737832               | -0.013378 | -0.230425 | 0.033430  |
| BIO4 (Temperature Seasonality (standard deviation ×100))     | 0.658443               | 0.276399  | -0.591564 | 0.263856  |
| BIO5 (Max Temperature of Warmest Month)                      | -0.129533              | 0.293355  | -0.904799 | 0.145803  |
| BIO8 (Mean Temperature of Wettest Quarter)                   | -0.668216              | 0.131682  | -0.016960 | -0.697122 |
| BIO9 (Mean Temperature of Driest Quarter)                    | -0.805548              | 0.391868  | -0.314716 | 0.150660  |
| BIO12 (Annual Precipitation)                                 | 0.075741               | -0.932956 | -0.330894 | -0.086195 |
| BIO15 (Precipitation Seasonality (Coefficient of Variation)) | -0.902650              | -0.383994 | 0.016030  | 0.107085  |
| BIO17 (Precipitation of Driest Quarter)                      | 0.896740               | -0.277629 | -0.163863 | -0.238528 |
| BIO19 (Precipitation of Coldest Quarter)                     | -0.413623              | -0.829073 | -0.334827 | 0.122444  |
| SOLAR6 (solar radiation in June)                             | -0.867412              | 0.139048  | -0.096547 | 0.421508  |
| ALT (Altitude)                                               | 0.090669               | -0.172910 | 0.376888  | 0.869821  |
| Eigenvalue                                                   | 5.53                   | 2.17      | 1.73      | 1.64      |
| % Total Variance                                             | 46.10                  | 18.05     | 14.45     | 13.71     |
